# Supplementary material for: Humidity dependency of the thermal phase transition of a cyano bridged Co–W bimetal assembly
Source: Royal Society of Chemistry journal article supplement (doi:10.1039/c3nj01656k), 2014-01-01
Supplement: c3nj01656k1.pdf [file c3nj01656k1.pdf]

**Supplementary Information**

**Humidity dependency of the thermal phase transition  
of a cyano-bridged Co-W bimetal assembly**

Noriaki Ozaki,<sup>a</sup> Hiroko Tokoro,<sup>a,b</sup> Yasuto Miyamoto,<sup>a</sup> and Shin-ichi Ohkoshi<sup>a,c\*</sup>

<sup>a</sup>*Department of Chemistry, School of Science, The University of Tokyo  
7-3-1 Hongo, Bunkyo-ku, Tokyo 113-0033, Japan*

<sup>b</sup>*NEXT, JSPS, 8-Ichibancho, Chiyoda-ku, Tokyo 102-8472, Japan*

<sup>c</sup>*CREST, JST, K's Gobancho, 7 Gobancho, Chiyoda-ku, Tokyo 102-0076, Japan*

\* To whom correspondence should be addressed.

ohkoshi@chem.s.u-tokyo.ac.jp (S. Ohkoshi)

Tel: +81-3-5841-4331

Fax: +81-3-3812-1896

Contents:

- §1 The results of Rietveld analyses and the atomic coordinates
- §2 Humidity dependence of the transition temperatures and thermal hysteresis
- §3 DSC measurement
- §4 Spin entropy change due to a phase transition

## §1. The results of Rietveld analyses and the atomic coordinates

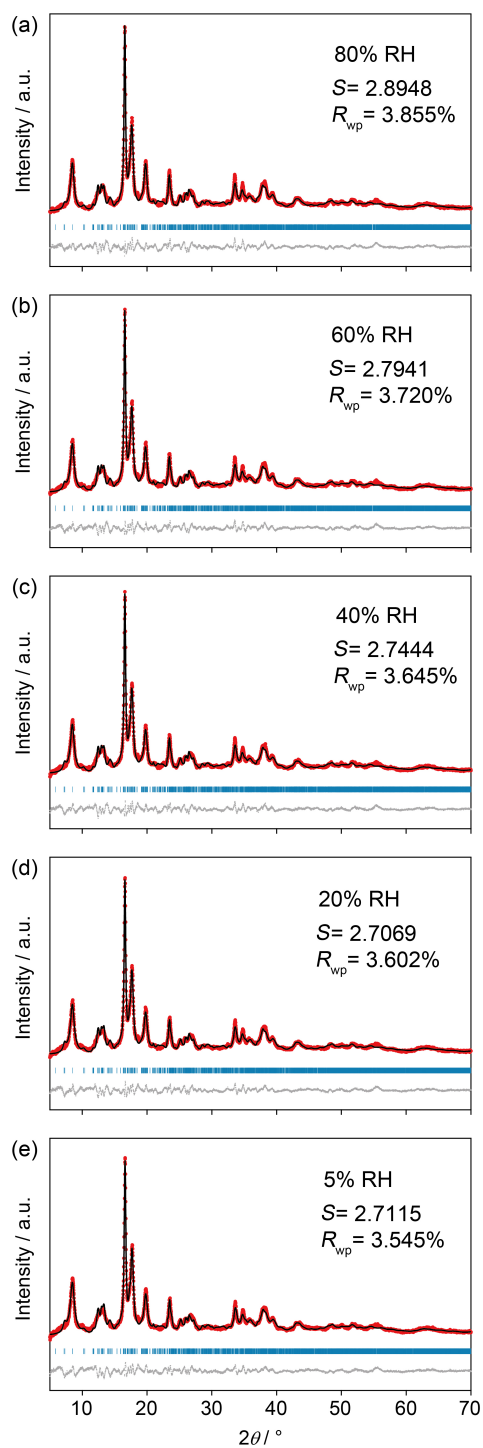

**Fig. S1** XRD patterns and Rietveld analyses of  $\text{Co}_3[\text{W}(\text{CN})_8]_2(4\text{-methylpyridine})_2(\text{pyrimidine})_2 \cdot x\text{H}_2\text{O}$  for (a) 80% RH, (b) 60% RH, (c) 40% RH, (d) 20% RH, and (e) 5% RH. Black points, red lines, blue bars, and gray points indicate the observed patterns, calculated patterns, Bragg peak positions, and residual curves, respectively.

**Table S1.** Atomic coordinates of  $\text{Co}_3[\text{W}(\text{CN})_8]_2(4\text{-methylpyridine})_2(\text{pyrimidine})_2 \cdot x\text{H}_2\text{O}$ 

| Atom | <i>x</i> | <i>y</i> | <i>z</i> | Atom | <i>x</i> | <i>y</i> | <i>z</i> |
|------|----------|----------|----------|------|----------|----------|----------|
| Co1  | 0.55     | 0.90     | 0.74     | C31  | 0.48     | 0.58     | 0.88     |
| Co2  | 0.54     | 0.42     | 0.78     | C32  | 0.65     | 0.62     | 0.99     |
| Co3  | 0.50     | 0.50     | 0.50     | C33  | 0.78     | 0.56     | 0.98     |
| Co4  | 0.00     | 0.00     | 0.00     | C34  | 0.76     | 0.50     | 0.92     |
| W1   | 0.03     | 0.15     | 0.74     | C35  | 0.50     | 0.63     | 0.94     |
| W2   | 0.98     | 0.65     | 0.69     | C36  | 0.67     | 0.67     | 0.05     |
| C1   | 0.89     | 0.29     | 0.77     | N1   | 0.81     | 0.35     | 0.79     |
| C2   | 0.91     | 0.02     | 0.75     | N2   | 0.84     | 0.96     | 0.75     |
| C3   | 0.09     | 0.08     | 0.85     | N3   | 0.09     | 1.04     | 0.90     |
| C4   | 0.28     | 0.06     | 0.77     | N4   | 0.40     | 0.01     | 0.78     |
| C5   | 0.27     | 0.14     | 0.83     | N5   | 0.41     | 0.12     | 0.86     |
| C6   | 0.91     | 0.16     | 0.66     | N6   | 0.86     | 0.17     | 0.61     |
| C7   | 0.09     | 0.25     | 0.84     | N7   | 0.12     | 0.31     | 0.88     |
| C8   | 0.24     | 0.27     | 0.79     | N8   | 0.36     | 0.32     | 0.81     |
| C9   | 0.15     | 0.78     | 0.71     | N9   | 0.25     | 0.84     | 0.73     |
| C10  | 0.20     | 0.55     | 0.74     | N10  | 0.31     | 0.50     | 0.75     |
| C11  | 0.73     | 0.61     | 0.63     | N11  | 0.62     | 0.59     | 0.58     |
| C12  | 0.12     | 0.65     | 0.81     | N12  | 0.17     | 0.66     | 0.86     |
| C13  | 0.14     | 0.52     | 0.66     | N13  | 0.24     | 0.47     | 0.64     |
| C14  | 0.79     | 0.57     | 0.73     | N14  | 0.70     | 0.54     | 0.75     |
| C15  | 0.82     | 0.77     | 0.63     | N15  | 0.73     | 0.83     | 0.61     |
| C16  | 0.78     | 0.75     | 0.71     | N16  | 0.66     | 0.79     | 0.71     |
| C17  | 0.51     | 0.80     | 0.86     | N17  | 0.76     | 0.91     | 0.94     |
| C18  | 0.70     | 0.93     | 0.87     | N18  | 0.62     | 0.87     | 0.83     |
| C19  | 0.55     | 0.78     | 0.93     | N19  | 0.51     | 0.39     | 0.58     |
| C20  | 0.68     | 0.83     | 0.97     | N20  | 0.53     | 0.36     | 0.69     |
| C21  | 0.54     | 0.28     | 0.67     | N21  | 0.49     | 0.95     | 0.65     |
| C22  | 0.52     | 0.42     | 0.64     | N22  | 0.58     | 0.51     | 0.88     |
| C23  | 0.54     | 0.25     | 0.61     | O1   | 0.58     | 0.05     | 0.95     |
| C24  | 0.53     | 0.31     | 0.56     | O2   | 0.90     | 0.26     | 0.51     |
| C25  | 0.53     | 0.05     | 0.64     | O3   | 0.34     | 0.69     | 0.97     |
| C26  | 0.42     | 0.05     | 0.54     | O4   | 0.78     | 0.70     | 0.45     |
| C27  | 0.36     | 0.95     | 0.54     | O5   | 0.10     | 0.93     | 0.55     |
| C28  | 0.40     | 0.91     | 0.60     | O6   | 0.99     | 0.39     | 0.97     |
| C29  | 0.50     | 0.09     | 0.59     | O7   | 0.15     | 0.87     | 1.00     |
| C30  | 0.39     | 0.10     | 0.47     | O8   | 0.78     | 0.45     | 0.47     |

\* The atomic coordinates are the same for all humidities.

## §2. Phase transition temperatures

**Table S2** Humidity dependence of the transition temperatures and thermal hysteresis

|                         | 100% RH | 80% RH | 60% RH | 40% RH | 20% RH | 5% RH |
|-------------------------|---------|--------|--------|--------|--------|-------|
| $T_{1/2\downarrow}$ / K | 147     | 152    | 157    | 168    | 174    | 191   |
| $T_{1/2\uparrow}$ / K   | 242     | 239    | 236    | 236    | 239    | 245   |
| $T_p$ / K               | 195     | 196    | 197    | 202    | 207    | 218   |
| $\Delta T$ / K          | 95      | 87     | 79     | 68     | 65     | 54    |

## §3. DSC measurements

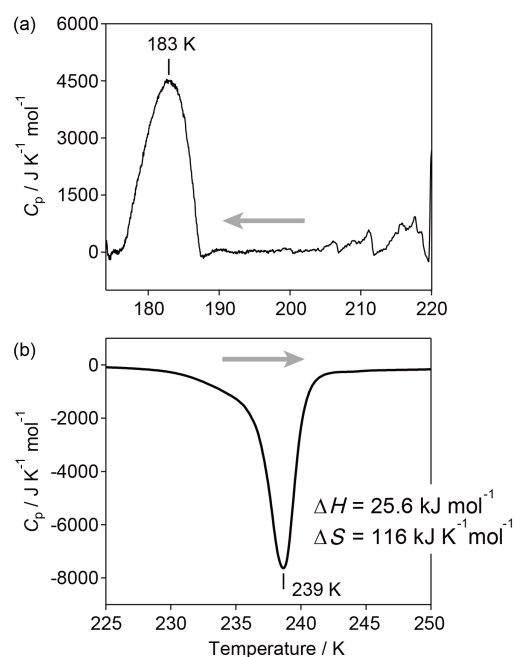

**Fig. S2** The DSC charts of  $\text{Co}_3[\text{W}(\text{CN})_8]_2(4\text{-methylpyridine})_2(\text{pyrimidine})_2 \cdot x\text{H}_2\text{O}$  in (a) cooling and (b) warming processes.

#### §4. Spin entropy change due to a phase transition

The change in the spin entropy ( $\Delta S_{\text{spin}}$ ) is calculated from the orbital degeneracy and the spin multiplicity. In the present complex, Co has an octahedral ( $D_{4h}$ ) symmetry. The electronic states of  $\text{Co}^{\text{II}}$  and  $\text{Co}^{\text{III}}$  are  ${}^4E_g$  and  ${}^1A_{1g}$ , respectively. On the other hand, W has a dodecahedron ( $C_{2v}$ ) symmetry, and the electronic states of  $\text{W}^{\text{V}}$  and  $\text{W}^{\text{IV}}$  are  ${}^2B_1$  and  ${}^1A_1$ , respectively. Therefore, the electronic states are:

$$\begin{aligned} \text{HT phase: } & 3D_{4h}\text{Co}^{\text{II}}({}^4E_g) - 2C_{2v}\text{W}^{\text{V}}({}^2B_1) \\ \text{LT phase: } & 2D_{4h}\text{Co}^{\text{III}}({}^1A_{1g}) - D_{4h}\text{Co}^{\text{II}}({}^4E_g) - 2C_{2v}\text{W}^{\text{IV}}({}^1A_1) \end{aligned}$$

The degeneracy of each phase is expressed by the product of the orbital degeneracy and the spin multiplicity.  $D_{4h}\text{Co}^{\text{III}}({}^1A_{1g})$  is  $1 \times 1$ ,  $C_{2v}\text{W}^{\text{IV}}({}^1A_1)$  is  $1 \times 1$ ,  $D_{4h}\text{Co}^{\text{II}}({}^4E_g)$  is  $2 \times 4$ , and  $C_{2v}\text{W}^{\text{V}}({}^2B_1)$  is  $1 \times 2$ . Therefore, the degeneracies are:

$$\begin{aligned} \text{HT phase: } & (2 \times 4)^3 \times (1 \times 2)^2 = 2048 \\ \text{LT phase: } & (1 \times 1)^2 \times (2 \times 4)^1 \times (1 \times 1)^2 = 8 \end{aligned}$$

Thus, the spin entropy of the HT and LT phases are  $S_{\text{spin, LT}} = R \ln 8$ ,  $S_{\text{spin, HT}} = R \ln 2048$ , respectively. Taking the difference of these values,  $\Delta S_{\text{spin}}$  is

$$\begin{aligned} \Delta S_{\text{spin}} &= S_{\text{spin, HT}} - S_{\text{spin, LT}} \\ &= R \ln 2048 - R \ln 8 \\ &= R \ln 256 \\ &= 46 \text{ J K}^{-1} \text{ mol}^{-1} \end{aligned}$$

This value is constant unless the orbital degeneracy and spin multiplicity change. In the present compound, these values are not affected by humidity.
